# Supplementary material for: Evaluation of Alignment Algorithms for Discovery and Identification of Pathogens Using RNA-Seq
Source: PubMed Central journal article supplement (PMC3813700; doi:10.1371/journal.pone.0076935), 2013-10-30
Supplement: pone.0076935.s001.pdf [file pone.0076935.s001.pdf]

---

**Supplemental Materials S1 -  
Evaluation of alignment  
algorithms for discovery and  
identification of pathogens  
using RNA-Seq.**

---

Ivan Borozan, Stuart Watt, Vincent Ferretti.

September 24, 2013

# Contents

|          |                                                                                          |           |
|----------|------------------------------------------------------------------------------------------|-----------|
| <b>1</b> | <b>RiSER framework</b>                                                                   | <b>1</b>  |
| <b>2</b> | <b>Version of aligners used</b>                                                          | <b>1</b>  |
| <b>3</b> | <b>Parameter value settings used for runtime measurements</b>                            | <b>2</b>  |
| <b>4</b> | <b>Parameter value settings for aligners (reads simulated from viral genomes)</b>        | <b>5</b>  |
| <b>5</b> | <b>Parameter value settings for aligners (reads simulated from the chr1 (hg19) refer</b> |           |
| <b>6</b> | <b>Supplementary Tables</b>                                                              | <b>10</b> |
| 6.1      | Results obtained with aligners' default parameter value settings:                        | 10        |
| 6.2      | Results obtained with aligners' moderate sensitivity parameter value settings:           | 14        |
| 6.3      | Results obtained with aligners' high sensitivity parameter value settings:               | 16        |
| <b>7</b> | <b>Supplementary Figures</b>                                                             | <b>21</b> |

## 1 RiSER framework

The RISER framework is available as open source on the github's webpage <https://github.com/oicr-ibc/riser> which also includes a full set of instructions for installing and running RiSER. The github's wiki page for this project contains links to all the datasets used in the manuscript and can be accessed here <https://github.com/oicr-ibc/riser/wiki>.

## 2 Version of aligners used

Novoalign (2.07.14)  
BFAST (0.7.0a)  
BWA (0.7.4-r385)  
SHRiMP2 (2.2.2)  
Bowtie2 (2.1.0)  
GSNAP (2012-07-03)  
BLAT (v.34)  
BLAST (2.2.25+)  
STAR (2.3.0)

### 3 Parameter value settings used for runtime measurements

#### **\*BFAST\***

##### **indexing:**

First ten indexes for each genome(s) were created using the following commands:

```
bfast fasta2brg -f genome.fa;
I=1;
for MASK in 11111111111111111111 1111101110111010100101011011111
1011110101101001011000011010001111111 10111001101001100100111101010001011111
11111011011101110111111111 111111100101001000101111101110111 111101011100101000101011
111101101011011001100000101101001011101 1111011010001000110101100101100110100111
1111010010110110101110010110111011
do
bfast index -f genome.fa -i $I -w 14 -m $MASK -n 4;
let I=I+1;
done
```

##### **Viral:**

```
bfast match -f genome.fa -r single_end_reads.fq > bfast_match_out
bfast localalign -U -f genome.fa -m bfast_match_out > bfast_localalign_out.baf
bfast postprocess -a 4 -f genome.fa -i bfast_localalign_out.baf
```

##### **Human(hg19+cDNA):**

```
bfast match -f genome.fa -r single_end_reads.fq > bfast_match_out
bfast localalign -U -f genome.fa -m bfast_match_out > bfast_localalign_out.baf
bfast postprocess -a 4 -f genome.fa -i bfast_localalign_out.baf
```

#### **\*BLAT\***

##### **Viral:**

```
blat -t=dna -q=rna -minScore=20 -stepSize=5 -maxIntron=750000 -makeOoc=11.ooc
genome.fa single_end_reads.fasta output.psl
blat -t=dna -q=rna -tileSize=11 -minIdentity=90 -minScore=20 -stepSize=5
-maxIntron=750000 -ooc=11.ooc
```

##### **Human(hg19+cDNA):**

```
blat -t=dna -q=rna -minScore=20 -stepSize=5 -maxIntron=750000 -makeOoc=11.ooc
genome.fa single_end_reads.fasta output.psl
blat -t=dna -q=rna -tileSize=11 -minIdentity=90 -minScore=20 -stepSize=5
-maxIntron=750000 -ooc=11.ooc
```

### **\*BLAST\***

#### **Viral:**

```
blastall -a 7 -p blastn -d genome.fa -m 8 -i single_end_reads.fasta -o output_BLAST.txt
```

#### **Human(hg19+cDNA):**

```
blastall -a 17 -p blastn -d genome.fa -m 8 -i single_end_reads.fasta -o output_BLAST.txt
```

### **\*Bowtie2\***

#### **indexing:**

```
bowtie2-build genome.fa genome
```

#### **Viral:**

```
bowtie2 -p 7 -local -k 100 -x genome -U single_end_reads.fq -S output.sam
```

#### **Human(hg19+cDNA):**

```
bowtie2 -p 17 -local -x genome -U single_end_reads.fq -S output.sam
```

### **\*BWA\***

#### **indexing:**

```
bwa index -a bwtsv genome.fa
```

#### **Viral:**

```
bwa aln -t 7 genome.fa single_end_reads.fq > forward.sai
```

```
bwa samse genome.fa forward.sai single_end_reads.fq
```

#### **Human(hg19+cDNA):**

```
bwa aln -t 17 genome.fa single_end_reads.fq > forward.sai
```

```
bwa samse genome.fa forward.sai single_end_reads.fq
```

### **\*BWAMEM\***

#### **indexing:**

```
same as for BWA
```

#### **Viral:**

```
bwa mem -t 7 -r 1.0 genome.fa single_end_reads.fq
```

#### **Human(hg19+cDNA)**

```
bwa mem -t 17 -r 1.0 genome.fa single_end_reads.fq
```

### **\*BWASW\***

#### **indexing:**

```
same as for BWA
```

**Viral:**

bwa bwasw -t 7 -z 5 genome.fa single\_end\_reads.fq

**Human(hg19+cDNA):**

bwa bwasw -t 17 -z 5 genome.fa single\_end\_reads.fq

**\*GSNAP\***

**indexing:**

gmap\_build -d genome genome.fa

**Viral:**

cat single\_end\_reads.fq | gsnap -m 10 -i 2 -N 1 -t 7 -A sam -D Genome\_directory  
-d genome

**Human(hg19):**

cat single\_end\_reads.fq | gsnap -m 10 -i 2 -N 1 -t 17 -A sam -D Genome\_directory  
-d genome

**\*Novoalign\***

**indexing:**

novoindex genome.nix genome.fa

**Viral:**

novoalign -d genome.nix -f single\_end\_reads.fq -o SAM

**Human(hg19+cDNA):**

novoalign -d genome.nix -f single\_end\_reads.fq -o SAM

**\*SHiMP2\***

**indexing:**

genome\_file\_name=genome.fa

**Viral:**

gmapper-ls -local -N 7 -qv-offset 33 single\_end\_reads.fq genome\_file\_name

**Human(hg19+cDNA):**

gmapper-ls -local -N 17 -qv-offset 33 single\_end\_reads.fq genome\_file\_name

**\*STAR\***

**indexing:**

**Viral:**

star -runMode genomeGenerate -genomeDir /genome/star GenomeDir -  
genomeFastaFiles genome.fa -genomeChrBinNbits 18 -runThreadN 8

**Human(hg19+cDNA):**

```
star --runMode genomeGenerate --genomeDir /genome/star GenomeDir --
genomeFastaFiles genome.fa --genomeChrBinNbits 14 --runThreadN 8
```

**Viral:**

```
star --genomeDir /genome/star --readFilesIn single_end_reads.fq --winAnchorMultimapNmax
200 --outSAMUnmapped Within --alignIntronMax 20000 --seedSearchStartLmax
25 --outFilterMultimapNmax 100
```

**Human(hg19+cDNA):**

```
star --runThreadN 17 --genomeDir /genome/star --readFilesIn single_end_reads.fq
```

## 4 Parameter value settings for aligners (reads simulated from viral genomes)

**\*BFAST\***

**Default/Moderate Sensitivity:**

```
bfast match -K 8 -M 384 -f genome.fa -r single_end_reads.fq > bfast_match_out
bfast localalign -M 384 -U -f genome.fa -m bfast_match_out > bfast_localalign_out.baf
bfast postprocess -a 4 -f genome.fa -i bfast_localalign_out.baf
```

**Reporting multiple alignments**

```
bfast postprocess -a 1 -f genome.fa -i bfast_localalign_out.baf
```

**High Sensitivity:**

```
bfast match -K 8 -M 1280 -f genome.fa -r single_end_reads.fq > bfast_match_out
bfast localalign -M 1280 -U -f genome.fa -m bfast_match_out > bfast_localalign_out.baf
bfast postprocess -a 4 -f genome.fa -i bfast_localalign_out.baf
```

**Reporting multiple alignments**

```
bfast postprocess -a 1 -f genome.fa -i bfast_localalign_out.baf
```

**\*BLAT\***

**Default:**

```
blat -t=dna -q=rna -minScore=30 -maxIntron=750000 -makeOoc=11.ooc
genome.fa single_end_reads.fasta output.psl
blat -t=dna -q=rna -tileSize=11 -minIdentity=90 -minScore=30 -stepSize=11
-maxIntron=750000 -ooc=11.ooc
```

**Moderate sensitivity:**

```
blat -t=dna -q=rna -minScore=30 -stepSize=5 -maxIntron=750000 -makeOoc=11.ooc
```

```
genome.fa single_end_reads.fasta output.psl
blat -t=dna -q=rna -tileSize=11 -minIdentity=90 -minScore=30 -stepSize=5
-maxIntron=750000 -ooc=11.ooc
```

**High sensitivity:**

```
blat -t=dna -q=rna -minIdentity=85 -minScore=20 -stepSize=5 -maxIntron=750000
-makeOoc=11.ooc genome.fa single_end_reads.fasta output.psl
blat -t=dna -q=rna -tileSize=11 -minIdentity=85 -minScore=20 -stepSize=5
-maxIntron=750000 -ooc=11.ooc
```

**\*BLAST\***

**Low sensitivity:**

```
blastn -word_size 16 -task megablast -query=single_end_reads.fasta -db=genome.fa
-evalue 0.0000001
```

**Moderate sensitivity:**

```
blastn -word_size 10 -task megablast -query=single_end_reads.fasta -db=genome.fa
-evalue 0.0000001
```

**High sensitivity:**

```
blastn -word_size 7 -task megablast -query=single_end_reads.fasta -db=genome.fa
-evalue 0.0000001
```

**\*Bowtie2\***

**Default:**

```
bowtie2 -k 100 -x genome -U single_end_reads.fq -S output.sam
```

**Moderate sensitivity:**

```
bowtie2 -local -k 100 -x genome -U single_end_reads.fq -S output.sam
```

**High sensitivity:**

```
bowtie2 -very-sensitive-local -N 1 -k 100 -x genome -U single_end_reads.fq -S
output.sam
```

**\*BWA\***

**indexing:**

```
bwa index -a is genome.fa
```

**Default:**

```
bwa aln genome.fa single_end_reads.fq > forward.sai
```

```
bwa samse genome.fa forward.sai single_end_reads.fq > output.sam
```

**Moderate sensitivity:**

```
bwa aln aln -n 5 -e 10 -o 3 -l 22 genome.fa single_end_reads.fq > forward.sai  
bwa samse genome.fa forward.sai single_end_reads.fq > output.sam
```

**High sensitivity:**

```
bwa aln -n 7 -e 10 -o 3 -l 1000 genome.fa single_end_reads.fq > forward.sai  
bwa samse genome.fa forward.sai single_end_reads.fq > output.sam
```

**\*BWAMEM\***

**Default:**

```
bwa mem genome.fa single_end_reads.fq > output.sam
```

**Reporting multiple alignments**

```
bwa mem -a genome.fa single_end_reads.fq > output.sam
```

**Moderate sensitivity:**

```
bwa mem -r 1.0 genome.fa single_end_reads.fq > output.sam
```

**Reporting multiple alignments**

```
bwa mem -a -r 1.0 genome.fa single_end_reads.fq > output.sam
```

**High sensitivity:**

```
bwa mem -r 0.5 genome.fa single_end_reads.fq > output.sam
```

**Reporting multiple alignments**

```
bwa mem -a -r 0.5 genome.fa single_end_reads.fq > output.sam
```

**\*BWASW\***

**indexing:**

same as for BWA

**Default:**

```
bwa bwasw genome.fa single_end_reads.fq > output.sam
```

**Moderate sensitivity:**

```
bwa bwasw -z 5 genome.fa single_end_reads.fq > output.sam
```

**High sensitivity:**

```
bwa bwasw -z 10 genome.fa single_end_reads.fq > output.sam
```

**\*GSNAP\***



**Default:**

```
cat single_end_reads.fq | gsnap -A sam -D Genome_directory -d genome
```

**Moderate sensitivity:**

```
cat single_end_reads.fq | gsnap -m 10 -i 2 -N 1 -A sam -D Genome_directory  
-d genome
```

**High sensitivity:**

```
cat single_end_reads.fq | gsnap -m 12 -i 2 -N 1 -A sam -D Genome_directory  
-d genome
```

**\*Novoalign\*****Default:**

```
novoalign -d genome.nix -f single_end_reads.fq -o SAM
```

**Reporting multiple alignments**

```
novoalign -d genome.nix -f single_end_reads.fq -o SAM -r All
```

**\*SHiMP2\*****Default:**

```
gmapper-ls -qv-offset 33 single_end_reads.fq genome_file_name
```

**Moderate sensitivity:**

```
gmapper-ls -qv-offset 33 -local single_end_reads.fq genome_file_name
```

**High sensitivity:**

```
gmapper-ls -V -w 150% -n 1 -r 50% -l 40% -Z -h 60% -a -1 -qv-offset 33  
-local single_end_reads.fq genome_file_name
```

**\*STAR\*****indexing:**

```
STAR --runMode genomeGenerate --genomeSAindexNbases 2 --genomeDir  
/genome/star GenomeDir --genomeFastaFiles genome.fa
```

**Default:**

```
star --genomeDir /genome/star --readFilesIn single_end_reads.fq --winAnchorMultimapNmax  
200 --outSAMunmapped Within --alignIntronMax 20000 --outFilterMultimapNmax  
100
```

**Moderate sensitivity:**

```
star --genomeDir /genome/star --readFilesIn single_end_reads.fq --winAnchorMultimapNmax  
200 --outSAMunmapped Within --alignIntronMax 20000 --seedSearchStartLmax  
25 --outFilterMultimapNmax 100
```

**High sensitivity:**

```
star --genomeDir /genome/star --readFilesIn single_end_reads.fq --winAnchorMultimapNmax  
200 --outSAMunmapped Within --alignIntronMax 20000 --seedSearchStartLmax  
12 --outFilterMultimapNmax 100 --outFilterMismatchNmax 20
```

## 5 Parameter value settings for aligners (reads simulated from the chr1 (hg19) reference)

**\*BFAST\***

```
bfast match -K 8 -M 384 -f genome.fa -r single_end_reads.fq > bfast_match_out  
bfast localalign -M 384 -U -f genome.fa -m bfast_match_out > bfast_localalign_out.baf  
bfast postprocess -a 4 -f genome.fa -i bfast_localalign_out.baf
```

**\*BLAT\***

```
blat -t=dna -q=rna -minScore=20 -stepSize=5 -maxIntron=750000 -makeOoc=11.ooc  
genome.fa single_end_reads.fasta output.psl  
blat -t=dna -q=rna -tileSize=11 -minIdentity=90 -minScore=30 -stepSize=5  
-maxIntron=750000 -ooc=11.ooc
```

**\*Bowtie2\***

```
bowtie2 --local -x genome -U single_end_reads.fq -S output.sam
```

**\*BWA\***

```
bwa aln aln -n 5 -e 10 -o 3 -l 22 genome.fa single_end_reads.fq > forward.sai
```

**\*BWAMEM\***

```
bwa mem -r 1.0 genome.fa single_end_reads.fq > output.sam
```

**\*BWASW\***

```
bwa bwasmw -z 5 genome.fa single_end_reads.fq > output.sam
```

**\*GSNAP\***

```
cat single_end_reads.fq | gsnap -m 10 -i 2 -N 1 -A sam -D Genome_directory  
-d genome
```

**\*Novoalign\***

```
novoalign -d genome.nix -f single_end_reads.fq -o SAM
```

**\*SHiMP2\***

```
gmapper-ls -qv-offset 33 -local single_end_reads.fq genome_file_name
```

**\*STAR\***

```
star --genomeDir /genome/star --readFilesIn single_end_reads.fq --seedSearchStartLmax  
25
```

## 6 Supplementary Tables

### 6.1 Results obtained with aligners' default parameter value settings:

Summary of S1 and S2 scores for viral reference sequences

| Aligner   | $PA$ (percentage of aligned reads (non-junctions)) (%) | $PA_j$ (percentage of aligned reads (junctions)) (%) | $A$ non-junctions (%) | $A_j$ (junctions) (%) | S1    | S2    |
|-----------|--------------------------------------------------------|------------------------------------------------------|-----------------------|-----------------------|-------|-------|
| Novoalign | 99.96                                                  | 21.62                                                | 99.92                 | 92.52                 | 99.94 | 44.73 |
| SHRiMP2   | 99.97                                                  | 56.74                                                | 99.89                 | 76.15                 | 99.93 | 65.73 |
| BFAST     | 99.94                                                  | 99.97                                                | 98.82                 | 70.16                 | 99.38 | 83.75 |
| BLAST     | 98.43                                                  | 99.38                                                | 97.41                 | 70.28                 | 97.92 | 83.57 |
| BWASW     | 98.25                                                  | 95.26                                                | 95.98                 | 70.24                 | 97.11 | 81.8  |
| BWAMEM    | 96.83                                                  | 94.24                                                | 96.7                  | 69.2                  | 96.77 | 80.76 |
| STAR      | 94.57                                                  | 98.36                                                | 98.79                 | 97.5                  | 96.65 | 97.93 |
| BLAT      | 94.57                                                  | 91.8                                                 | 95.12                 | 77.51                 | 94.84 | 84.35 |
| Bowtie2   | 84.98                                                  | 29.17                                                | 100                   | 85.39                 | 92.18 | 49.91 |
| BWA       | 33.89                                                  | 1.75                                                 | 99.96                 | 96.68                 | 58.21 | 13.01 |
| GSNAP     | 33.94                                                  | 69.75                                                | 95.05                 | 64.99                 | 56.8  | 67.33 |

Table S1: Shows the summary of alignment results aggregated over four viral genomes for non-mutated viral reference sequences and sorted by S1 score. The average alignment accuracy for reads crossing splice junctions ( $\bar{A}_j$ ) and those not crossing splice junctions ( $\bar{A}$ ) is defined in the Materials and Methods section.

### Summary of values for the $FS$ measure

| Aligner   | Mutation (0%) | Mutation (2%) | Mutation (5%) | Mutation (10%) | Mutation (15%) | Mutation (20%) | Mutation (25%) |
|-----------|---------------|---------------|---------------|----------------|----------------|----------------|----------------|
| BFAST     | 89.87         | 90.14         | 91            | 87.79          | 73.78          | 50.53          | 25.64          |
| SHRiMP2   | 94.72         | 94.43         | 93.76         | 86.76          | 63.29          | 26.27          | 5.86           |
| BLAST     | 92.86         | 92.36         | 89.89         | 76.52          | 56.35          | 35.9           | 13.73          |
| BWAMEM    | 96.06         | 92.48         | 83.69         | 56.48          | 27.6           | 8.49           | 1.73           |
| BWASW     | 94.73         | 90.44         | 80.73         | 53.2           | 26.16          | 7.8            | 1.49           |
| STAR      | 98.05         | 95.08         | 83.07         | 44.81          | 13.19          | 0.96           | 0              |
| BLAT      | 95.75         | 89.53         | 73.44         | 39.9           | 15.4           | 5.63           | 1              |
| Novoalign | 96.27         | 95.19         | 83.85         | 33.17          | 3.7            | 0.08           | 0              |
| Bowtie2   | 88.62         | 79.21         | 60.64         | 29.52          | 7.08           | 0.65           | 0              |
| GSNAP     | 54.77         | 35.95         | 17.86         | 9.95           | 7.99           | 4.66           | 1.47           |
| BWA       | 51.78         | 28.15         | 6.69          | 0.38           | 0              | 0              | 0              |

Table S2: Shows values of the  $FS(\beta = 1, k = 0.13)$  measure averaged over four viral genomes (see Table.2) as a function of viral mutation rates, sorted according to the average  $FS(\beta = 1, k = 0.13)$  values for mutation rates  $\geq 2\%$ .

### Genome Coverage

| Aligner   | Mutation (0%) | Mutation (2%) | Mutation (5%) | Mutation (10%) | Mutation (15%) | Mutation (20%) | Mutation (25%) |
|-----------|---------------|---------------|---------------|----------------|----------------|----------------|----------------|
| BFAST     | 97-100        | 97-100        | 96-100        | 97-100         | 94-98          | 76-85          | 49-55          |
| BLAST     | 97-100        | 97-100        | 96-100        | 93-99          | 78-87          | 52-67          | 24-28          |
| SHRiMP2   | 97-100        | 97-100        | 96-100        | 97-100         | 86-93          | 43-54          | 6-12           |
| BWASW     | 97-100        | 97-100        | 96-100        | 94-96          | 60-67          | 20-25          | 0-8            |
| BWAMEM    | 97-100        | 97-100        | 94-100        | 78-83          | 31-42          | 7-11           | 0-3            |
| Bowtie2   | 97-100        | 96-100        | 94-99         | 53-82          | 15-49          | 1-21           | 0-4            |
| STAR      | 97-100        | 97-100        | 96-100        | 71-74          | 21-28          | 0-4            | 0-0            |
| BLAT      | 97-100        | 96-100        | 83-99         | 59-68          | 19-22          | 4-6            | 0-1            |
| Novoalign | 97-100        | 97-100        | 92-99         | 45-54          | 0-10           | 0-1            | 0-0            |
| GSNAP     | 96-97         | 66-76         | 24-39         | 9-18           | 5-10           | 4-6            | 0-2            |
| BWA       | 96-97         | 63-69         | 7-19          | 0-1            | 0-0            | 0-0            | 0-0            |

Table S3: The summary of values of genomes' coverage in terms of their minimum and maximum values (i.e., min-max) obtained by each individual aligner, averaged over four viral genomes (see Table.2) as a function of viral mutation rates and sorted according to the average coverage for mutation rates  $> 5\%$ .

## Precision

| Aligner   | Mutation (0%) | Mutation (2%) | Mutation (5%) | Mutation (10%) | Mutation (15%) | Mutation (20%) | Mutation (25%) |
|-----------|---------------|---------------|---------------|----------------|----------------|----------------|----------------|
| BLAST     | 83.12         | 85.90         | 89.54         | 92.42          | 93.76          | 96.01          | 97.98          |
| BFAST     | 70.94         | 73.38         | 79.34         | 86.05          | 86.97          | 90.07          | 86.6           |
| BLAT      | 99.64         | 99.25         | 99.2          | 98.95          | 96.97          | 98.95          | 73.3           |
| Bowtie2   | 97.09         | 97.28         | 98.31         | 98.73          | 99.27          | 75             | 0              |
| BWA       | 99.68         | 99.65         | 99.18         | 50             | 0              | 0              | 0              |
| GSNAP     | 96.18         | 91.74         | 90.22         | 93.48          | 88.9           | 98.13          | 71.87          |
| Novoalign | 99.68         | 99.53         | 99.71         | 99.37          | 75             | 25             | 0              |
| SHRiMP2   | 88.54         | 89.95         | 92.61         | 96.06          | 97.82          | 98.29          | 98.98          |
| BWASW     | 99.83         | 99.72         | 99.81         | 99.55          | 99.46          | 99.74          | 74.09          |
| BWAMEM    | 96.67         | 96.43         | 97.11         | 97.83          | 97.67          | 98.47          | 73.19          |
| STAR      | 99.66         | 99.5          | 99.57         | 99.44          | 99.57          | 49.69          | 0              |

Table S4: Shows values for precision (see Materials and Methods section for the definition of precision) for each aligner as a function of the viral sequence mutation rate.

## Sensitivity

| Aligner   | Mutation (0%) | Mutation (2%) | Mutation (5%) | Mutation (10%) | Mutation (15%) | Mutation (20%) | Mutation (25%) |
|-----------|---------------|---------------|---------------|----------------|----------------|----------------|----------------|
| BLAST     | 97.56         | 95.68         | 90.38         | 66.68          | 39.92          | 19.46          | 5.32           |
| BFAST     | 99.86         | 99.87         | 98.92         | 90.41          | 65.28          | 34.05          | 13.06          |
| BLAT      | 96.55         | 86.94         | 62.24         | 24.94          | 6.72           | 1.7            | 0.25           |
| Bowtie2   | 84.82         | 69.34         | 44.11         | 14.62          | 2.2            | 0.1            | 0              |
| BWA       | 34.43         | 13.67         | 1.86          | 0.05           | 0              | 0              | 0              |
| GSNAP     | 35.24         | 18.3          | 7.29          | 3.67           | 2.94           | 1.47           | 0.32           |
| Novoalign | 100           | 99.68         | 80.19         | 17.60          | 0.99           | 0.01           | 0              |
| SHRiMP2   | 99.99         | 99.92         | 99.13         | 86.87          | 48.94          | 12.91          | 1.89           |
| BWASW     | 89.39         | 78.58         | 59.14         | 25.87          | 8.46           | 1.53           | 0.27           |
| BWAMEM    | 98.21         | 92.57         | 78.14         | 41.14          | 14.6           | 2.9            | 0.62           |
| STAR      | 98.92         | 94.53         | 74.22         | 26.7           | 4.51           | 0.12           | 0              |

Table S5: Shows values for sensitivity (or recall) (see Materials and Methods section for the definition of sensitivity) for each aligner as a function of the viral sequence mutation rate.

## FS measure for $k = 0$ and $k = 1$

| Aligner   | $FS(\beta = 1, k = 0)$ | $FS(\beta = 1, k = 1)$ | Odds ratios of change between $k = 1$ and $k = 0$ |
|-----------|------------------------|------------------------|---------------------------------------------------|
| BLAST     | 93.75                  | 86.61                  | 2.32                                              |
| BFAST     | 90.8                   | 83.35                  | 1.97                                              |
| BLAT      | 96.44                  | 90.95                  | 2.7                                               |
| Bowtie2   | 91.36                  | 67.22                  | 5.15                                              |
| BWA       | 54.58                  | 25.8                   | 3.46                                              |
| GSNAP     | 54.12                  | 58.93                  | 0.82                                              |
| Novoalign | 99.89                  | 66.82                  | 448.97                                            |
| SHRiMP2   | 96.88                  | 78.57                  | 8.47                                              |
| BWASW     | 95.7                   | 87.84                  | 3.08                                              |
| BWAMEM    | 97.1                   | 88.7                   | 4.26                                              |
| STAR      | 97.96                  | 98.61                  | 0.68                                              |

Table S6: Shows the change in values of the  $FS$  measure for each individual aligner when aligning reads generated from viral sequences without ( $k = 0$ ) and with splicing ( $k = 1$ ) (see also Table.2 and supplementary Table.S1).

## 6.2 Results obtained with aligners' moderate sensitivity parameter value settings:

### Precision

| Aligner   | Mutation (0%) | Mutation (2%) | Mutation (5%) | Mutation (10%) | Mutation (15%) | Mutation (20%) | Mutation (25%) |
|-----------|---------------|---------------|---------------|----------------|----------------|----------------|----------------|
| BLAST     | 72.56         | 75.63         | 81.28         | 88.41          | 92.34          | 95.65          | 97.34          |
| BFAST     | 70.94         | 73.38         | 79.34         | 86.05          | 86.97          | 90.07          | 86.6           |
| BLAT      | 99.63         | 99.26         | 99.09         | 98.23          | 95.69          | 98.53          | 98.34          |
| Bowtie2   | 92.38         | 93.46         | 95.03         | 94.98          | 94.51          | 96.50          | 60.56          |
| BWA       | 99.86         | 99.53         | 99.94         | 47.71          | 0              | 0              | 0              |
| GSNAP     | 99.47         | 98.95         | 97.76         | 94.57          | 90.72          | 90.64          | 86.96          |
| Novoalign | 99.68         | 99.53         | 99.71         | 99.37          | 75.00          | 25.00          | 0              |
| SHRiMP2   | 87.68         | 89.30         | 92.05         | 95.61          | 97.51          | 98.15          | 98.96          |
| BWASW     | 99.89         | 99.79         | 99.82         | 99.62          | 99.48          | 99.62          | 74.03          |
| BWAMEM    | 96.43         | 96.18         | 96.82         | 97.62          | 97.37          | 98.11          | 73.25          |
| STAR      | 99.66         | 99.5          | 99.57         | 99.49          | 99.59          | 49.7           | 0              |

Table S7: Shows values for precision (see Materials and Methods section for the definition of precision) for each aligner as a function of the viral sequence mutation rate.

### Sensitivity

| Aligner   | Mutation (0%) | Mutation (2%) | Mutation (5%) | Mutation (10%) | Mutation (15%) | Mutation (20%) | Mutation (25%) |
|-----------|---------------|---------------|---------------|----------------|----------------|----------------|----------------|
| BLAST     | 98.58         | 98.78         | 98.97         | 96.69          | 84.66          | 52.78          | 20.87          |
| BFAST     | 99.86         | 99.87         | 98.92         | 90.41          | 65.28          | 34.05          | 13.06          |
| BLAT      | 97.97         | 91.18         | 71.05         | 34.73          | 13.03          | 3.75           | 1.23           |
| Bowtie2   | 93.18         | 81.74         | 60.99         | 27.26          | 11.23          | 3.88           | 0.63           |
| BWA       | 35.76         | 14.63         | 2.01          | 0.05           | 0              | 0              | 0              |
| GSNAP     | 98.63         | 91.41         | 71.99         | 37.58          | 19.89          | 10.46          | 4.01           |
| Novoalign | 100.00        | 99.68         | 80.19         | 17.60          | 0.99           | 0.01           | 0.00           |
| SHRiMP2   | 99.99         | 99.92         | 99.17         | 88.28          | 53.07          | 15.45          | 2.46           |
| BWASW     | 96.41         | 90.25         | 77.95         | 41.37          | 16.54          | 3.39           | 0.63           |
| BWAMEM    | 98.21         | 92.56         | 78.11         | 41.11          | 14.58          | 2.89           | 0.62           |
| STAR      | 98.91         | 94.83         | 74.51         | 26.71          | 4.55           | 0.12           | 0              |

Table S8: Shows values for sensitivity (or recall) (see Materials and Methods section for the definition of sensitivity) for each aligner as a function of the viral sequence mutation rate.

### FS measure for $k = 0$ and $k = 1$



| Aligner   | $FS(\beta = 1, k = 0)$ | $FS(\beta = 1, k = 1)$ | Odds ratios of change between $k = 1$ and $k = 0$ |
|-----------|------------------------|------------------------|---------------------------------------------------|
| BLAST     | 90.59                  | 83.61                  | 1.89                                              |
| BFAST     | 90.8                   | 83.35                  | 1.97                                              |
| BLAT      | 97.19                  | 94.16                  | 2.14                                              |
| Bowtie2   | 94.52                  | 85.89                  | 2.83                                              |
| BWA       | 55.68                  | 26.4                   | 3.5                                               |
| GSNAP     | 97.99                  | 96.12                  | 1.97                                              |
| Novoalign | 99.89                  | 66.82                  | 448.97                                            |
| SHRiMP2   | 96.30                  | 84.41                  | 4.80                                              |
| BWASW     | 97.69                  | 90.17                  | 4.62                                              |
| BWAMEM    | 97.04                  | 88.65                  | 4.2                                               |
| STAR      | 97.75                  | 98.44                  | 0.69                                              |

Table S9: Shows the change in values of the  $FS$  measure for each individual aligner when aligning reads generated from viral sequences without ( $k = 0$ ) and with splicing ( $k = 1$ ) (see also Tables 2 and 3).

### 6.3 Results obtained with aligners' high sensitivity parameter value settings:

Summary of S1 and S2 scores for viral reference sequences

| Aligner   | $PA$ (percentage of aligned reads (non-junctions)) (%) | $PA_j$ (percentage of aligned reads (junctions)) (%) | $A$ non-junctions (%) | $A_j$ (junctions) (%) | S1    | S2    |
|-----------|--------------------------------------------------------|------------------------------------------------------|-----------------------|-----------------------|-------|-------|
| Novoalign | 99.96                                                  | 21.62                                                | 99.92                 | 92.52                 | 99.94 | 44.73 |
| BFAST     | 99.94                                                  | 99.97                                                | 99.45                 | 63.57                 | 99.69 | 79.72 |
| SHRiMP2   | 99.42                                                  | 56.64                                                | 98.78                 | 81.86                 | 99.1  | 68.09 |
| BLAST     | 99.49                                                  | 100                                                  | 97.4                  | 70.47                 | 98.44 | 83.94 |
| GSNAP     | 97.96                                                  | 98.27                                                | 97.02                 | 89.78                 | 97.49 | 93.93 |
| BWASW     | 98.61                                                  | 99.14                                                | 95.95                 | 69.63                 | 97.27 | 83.08 |
| Bowtie2   | 94.15                                                  | 91.32                                                | 99.48                 | 70.52                 | 96.78 | 80.25 |
| BWAMEM    | 96.83                                                  | 94.24                                                | 96.7                  | 69.2                  | 96.77 | 80.76 |
| BLAT      | 98.17                                                  | 98.82                                                | 95.01                 | 82.74                 | 96.58 | 90.42 |
| STAR      | 90.87                                                  | 95.3                                                 | 99.04                 | 97.92                 | 94.87 | 96.6  |
| BWA       | 66.82                                                  | 7.2                                                  | 99.93                 | 92.28                 | 81.71 | 25.78 |

Table S10: Shows the summary of alignment results aggregated over four viral genomes for non-mutated viral reference sequences and sorted by S1 score. The average alignment accuracy for reads crossing splice junctions ( $\bar{A}_j$ ) and those not crossing splice junctions ( $\bar{A}$ ) is defined in the Materials and Methods section.

### Summary of values for the $FS$ measure

| Aligner   | Mutation (0%) | Mutation (2%) | Mutation (5%) | Mutation (10%) | Mutation (15%) | Mutation (20%) | Mutation (25%) |
|-----------|---------------|---------------|---------------|----------------|----------------|----------------|----------------|
| BLAST     | 89.6          | 90.23         | 91.21         | 91.4           | 87.5           | 71.66          | 42.89          |
| BFAST     | 89.75         | 90.14         | 91            | 87.79          | 73.78          | 50.53          | 25.64          |
| GSNAP     | 98.25         | 96.29         | 89.49         | 65.82          | 41.58          | 25.79          | 11.3           |
| BLAT      | 97.68         | 96.09         | 90.43         | 70.62          | 43.87          | 21.09          | 7.63           |
| BWASW     | 97.24         | 95.55         | 91.25         | 72.6           | 43.42          | 14.64          | 3.28           |
| SHRiMP2   | 95.59         | 95.03         | 92.06         | 72.09          | 36.16          | 6.27           | 0.74           |
| STAR      | 97.39         | 95.34         | 88.98         | 66.01          | 32.3           | 5.98           | 0.64           |
| BWAMEM    | 96            | 92.42         | 83.63         | 56.44          | 27.58          | 8.48           | 1.73           |
| Bowtie2   | 93.79         | 88.09         | 76.45         | 48.72          | 27.58          | 12.21          | 3.03           |
| Novoalign | 96.27         | 95.19         | 83.85         | 33.17          | 3.7            | 0.08           | 0              |
| BWA       | 77.65         | 56.97         | 25.02         | 3.91           | 0.08           | 0              | 0              |

Table S11: Shows values of the  $FS(\beta = 1, k = 0.13)$  measure averaged over four viral genomes (see Table.2) as a function of viral mutation rates, sorted according to the average  $FS(\beta = 1, k = 0.13)$  values for mutation rates  $\geq 2\%$ .

### Genome Coverage

| Aligner   | Mutation (0%) | Mutation (2%) | Mutation (5%) | Mutation (10%) | Mutation (15%) | Mutation (20%) | Mutation (25%) |
|-----------|---------------|---------------|---------------|----------------|----------------|----------------|----------------|
| BLAST     | 97-100        | 97-100        | 96-100        | 97-100         | 95-100         | 93-97          | 72-78          |
| BFAST     | 97-100        | 97-100        | 96-100        | 97-100         | 94-98          | 76-85          | 49-55          |
| BWASW     | 97-100        | 97-100        | 96-100        | 96-99          | 72-79          | 33-43          | 0-10           |
| GSNAP     | 97-100        | 97-100        | 96-100        | 89-93          | 55-70          | 34-46          | 10-18          |
| BLAT      | 97-100        | 97-100        | 96-100        | 85-93          | 53-63          | 22-28          | 2-10           |
| SHRiMP2   | 97-100        | 97-100        | 96-100        | 91-97          | 58-64          | 3-17           | 0-3            |
| Bowtie2   | 97-100        | 96-100        | 94-99         | 80-86          | 45-57          | 14-22          | 0-7            |
| STAR      | 97-100        | 97-100        | 96-100        | 78-94          | 34-54          | 3-9            | 0-2            |
| BWAMEM    | 97-100        | 97-100        | 94-100        | 78-83          | 31-42          | 7-11           | 0-3            |
| Novoalign | 97-100        | 97-100        | 92-99         | 45-54          | 0-10           | 0-1            | 0-0            |
| BWA       | 97-100        | 87-97         | 43-59         | 6-8            | 0-0            | 0-0            | 0-0            |

Table S12: The summary of values of genomes' coverage in terms of their minimum and maximum values (i.e., min-max) obtained by each individual aligner, averaged over four viral genomes (see Table.2) as a function of viral mutation rates and sorted according to the average coverage for mutation rates  $> 5\%$ .

## Precision

| Aligner   | Mutation (0%) | Mutation (2%) | Mutation (5%) | Mutation (10%) | Mutation (15%) | Mutation (20%) | Mutation (25%) |
|-----------|---------------|---------------|---------------|----------------|----------------|----------------|----------------|
| BLAST     | 71.69         | 74.91         | 80.59         | 88.01          | 92.25          | 95.69          | 97.25          |
| BFAST     | 70.94         | 73.38         | 79.34         | 86.05          | 86.97          | 90.07          | 86.6           |
| BLAT      | 99.61         | 99.22         | 98.77         | 95.82          | 88.06          | 75.24          | 50.96          |
| Bowtie2   | 91.79         | 93.01         | 94.65         | 95.18          | 94.15          | 96.19          | 61.58          |
| BWA       | 99.91         | 99.76         | 99.83         | 99.78          | 25             | 0              | 0              |
| GSNAP     | 99.61         | 99.33         | 98.9          | 96.27          | 93.95          | 93.21          | 89.26          |
| Novoalign | 99.68         | 99.53         | 99.71         | 99.37          | 75             | 25             | 0              |
| SHRiMP2   | 92.46         | 93.76         | 95.86         | 97.89          | 99.14          | 99.34          | 49.1           |
| BWASW     | 99.88         | 99.85         | 99.8          | 99.69          | 99.33          | 99.65          | 74.04          |
| BWAMEM    | 96.42         | 96.18         | 96.82         | 97.61          | 97.37          | 98.11          | 73.31          |
| STAR      | 99.64         | 99.51         | 99.54         | 99.54          | 99.68          | 99.9           | 50             |

Table S13: Shows values for precision (see Materials and Methods section for the definition of precision) for each aligner as a function of the viral sequence mutation rate.

## Sensitivity

| Aligner   | Mutation (0%) | Mutation (2%) | Mutation (5%) | Mutation (10%) | Mutation (15%) | Mutation (20%) | Mutation (25%) |
|-----------|---------------|---------------|---------------|----------------|----------------|----------------|----------------|
| BLAST     | 98.94         | 99.04         | 99.3          | 98.53          | 88.56          | 56.26          | 22.84          |
| BFAST     | 99.82         | 99.87         | 98.89         | 90.33          | 65.24          | 34.05          | 13.06          |
| BLAT      | 99.61         | 98.69         | 91.54         | 63.58          | 32.09          | 11.05          | 3.91           |
| Bowtie2   | 94.1          | 83.27         | 64.07         | 30.37          | 13.22          | 4.23           | 0.83           |
| BWA       | 68.01         | 40.29         | 11.94         | 0.99           | 0.01           | 0              | 0              |
| GSNAP     | 99.37         | 97.25         | 86.61         | 53.22          | 27.51          | 14.49          | 5.37           |
| Novoalign | 100           | 99.68         | 80.19         | 17.6           | 0.99           | 0.01           | 0              |
| SHRiMP2   | 99.97         | 99.75         | 94.94         | 61.15          | 20.4           | 1.78           | 0.14           |
| BWASW     | 98.26         | 94.63         | 84.63         | 50.29          | 20.15          | 3.9            | 0.75           |
| BWAMEM    | 98.21         | 92.56         | 78.11         | 41.11          | 14.58          | 2.89           | 0.62           |
| STAR      | 99.85         | 99.13         | 93.76         | 60.08          | 19.52          | 1.86           | 0.14           |

Table S14: Shows values for sensitivity (or recall) (see Materials and Methods section for the definition of sensitivity) for each aligner as a function of the viral sequence mutation rate.

## FS measure for $k = 0$ and $k = 1$

| Aligner   | $FS(\beta = 1, k = 0)$ | $FS(\beta = 1, k = 1)$ | Odds ratios of change between $k = 1$ and $k = 0$ |
|-----------|------------------------|------------------------|---------------------------------------------------|
| BLAST     | 90.47                  | 83.54                  | 1.87                                              |
| BFAST     | 90.93                  | 81.31                  | 2.3                                               |
| BLAT      | 98.08                  | 94.9                   | 2.75                                              |
| Bowtie2   | 94.84                  | 86.36                  | 2.9                                               |
| BWA       | 81.32                  | 45.68                  | 5.18                                              |
| GSNAP     | 98.48                  | 96.67                  | 2.24                                              |
| Novoalign | 99.89                  | 66.82                  | 448.97                                            |
| SHRiMP2   | 97.57                  | 80.88                  | 9.51                                              |
| BWASW     | 98.16                  | 90.72                  | 5.47                                              |
| BWAMEM    | 97.04                  | 88.65                  | 4.19                                              |
| STAR      | 97.28                  | 98.16                  | 0.67                                              |

Table S15: Shows the change in values of the  $FS$  measure for each individual aligner when aligning reads generated from viral sequences without ( $k = 0$ ) and with splicing ( $k = 1$ ) (see also Table.2 and supplementary Table.S10).

## 7 Supplementary Figures

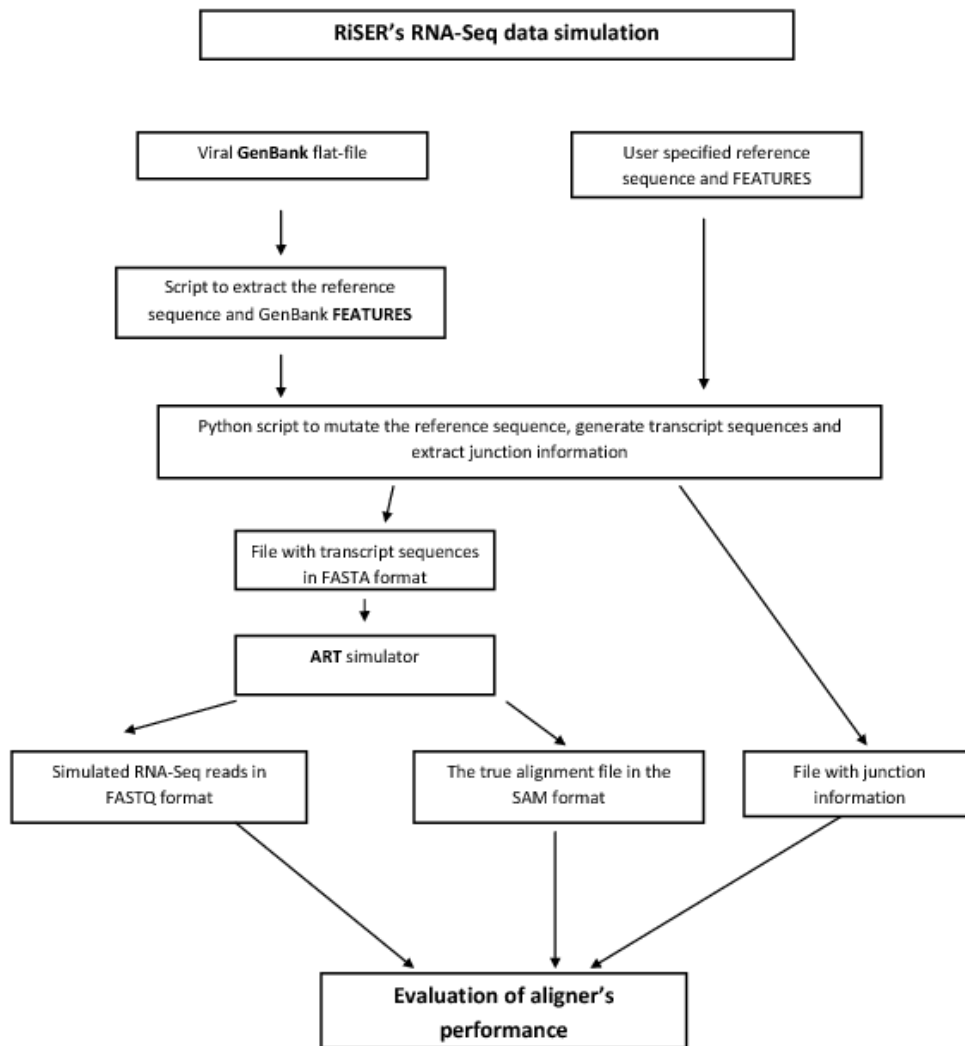

Figure S1: Shows the diagram of steps used for RNA-Seq data simulation in the RiSER's framework.

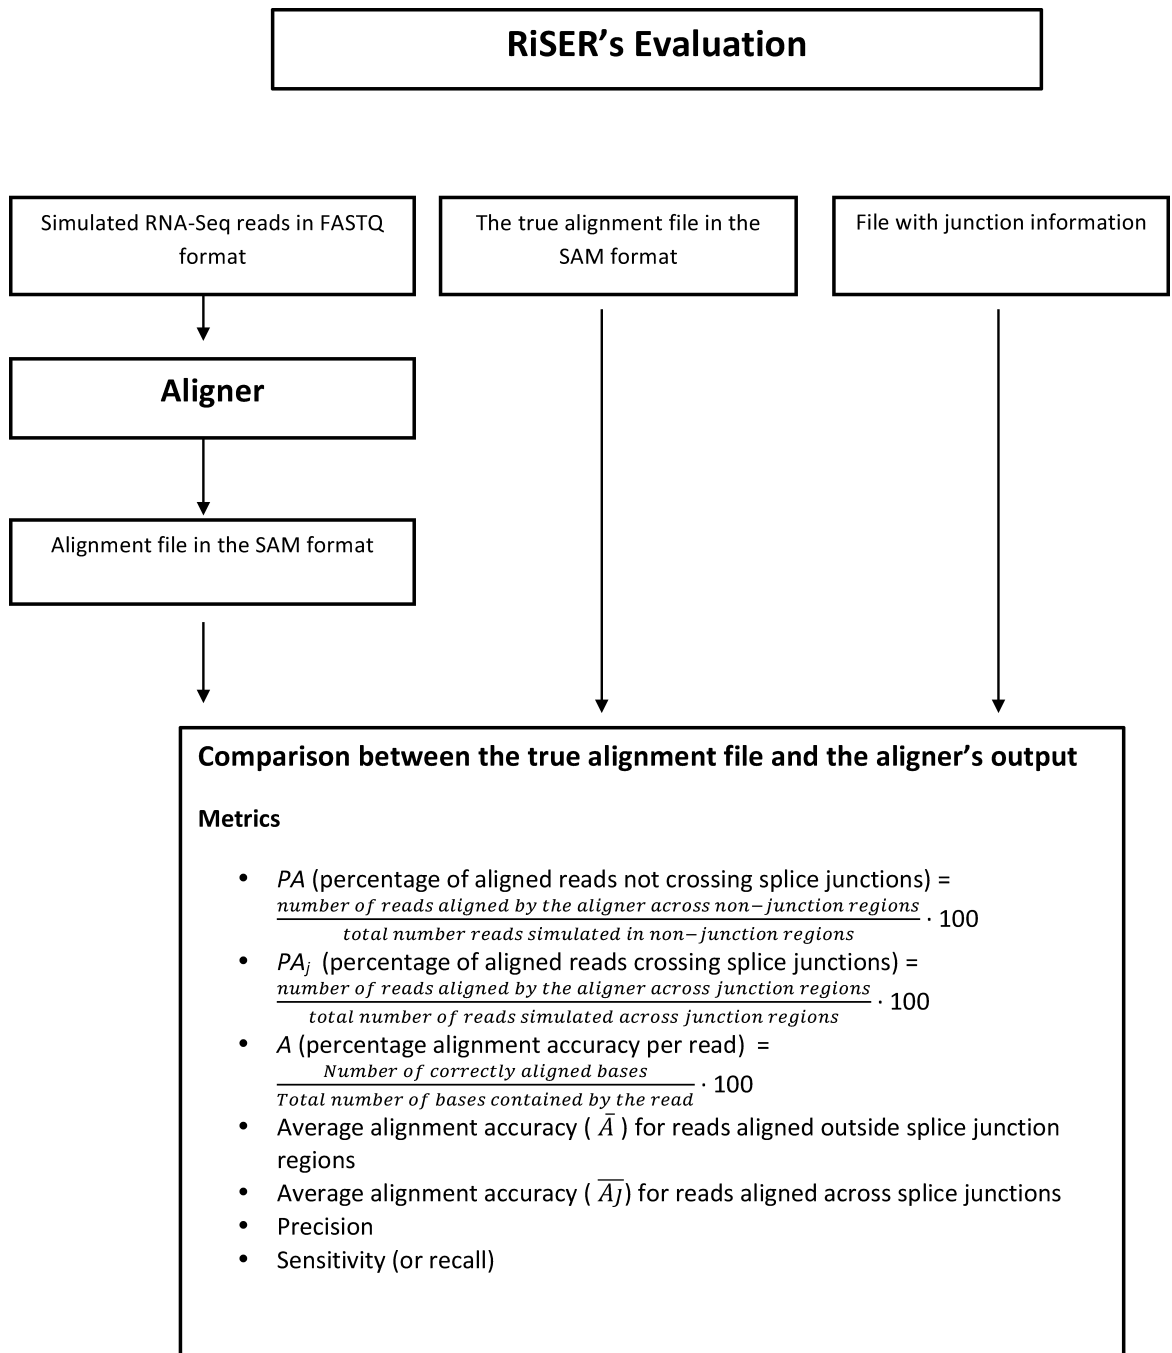

Figure S2: Shows RiSER's evaluation procedure (for each aligner) and metrics used (see Materials and Methods section) in the RiSER framework.

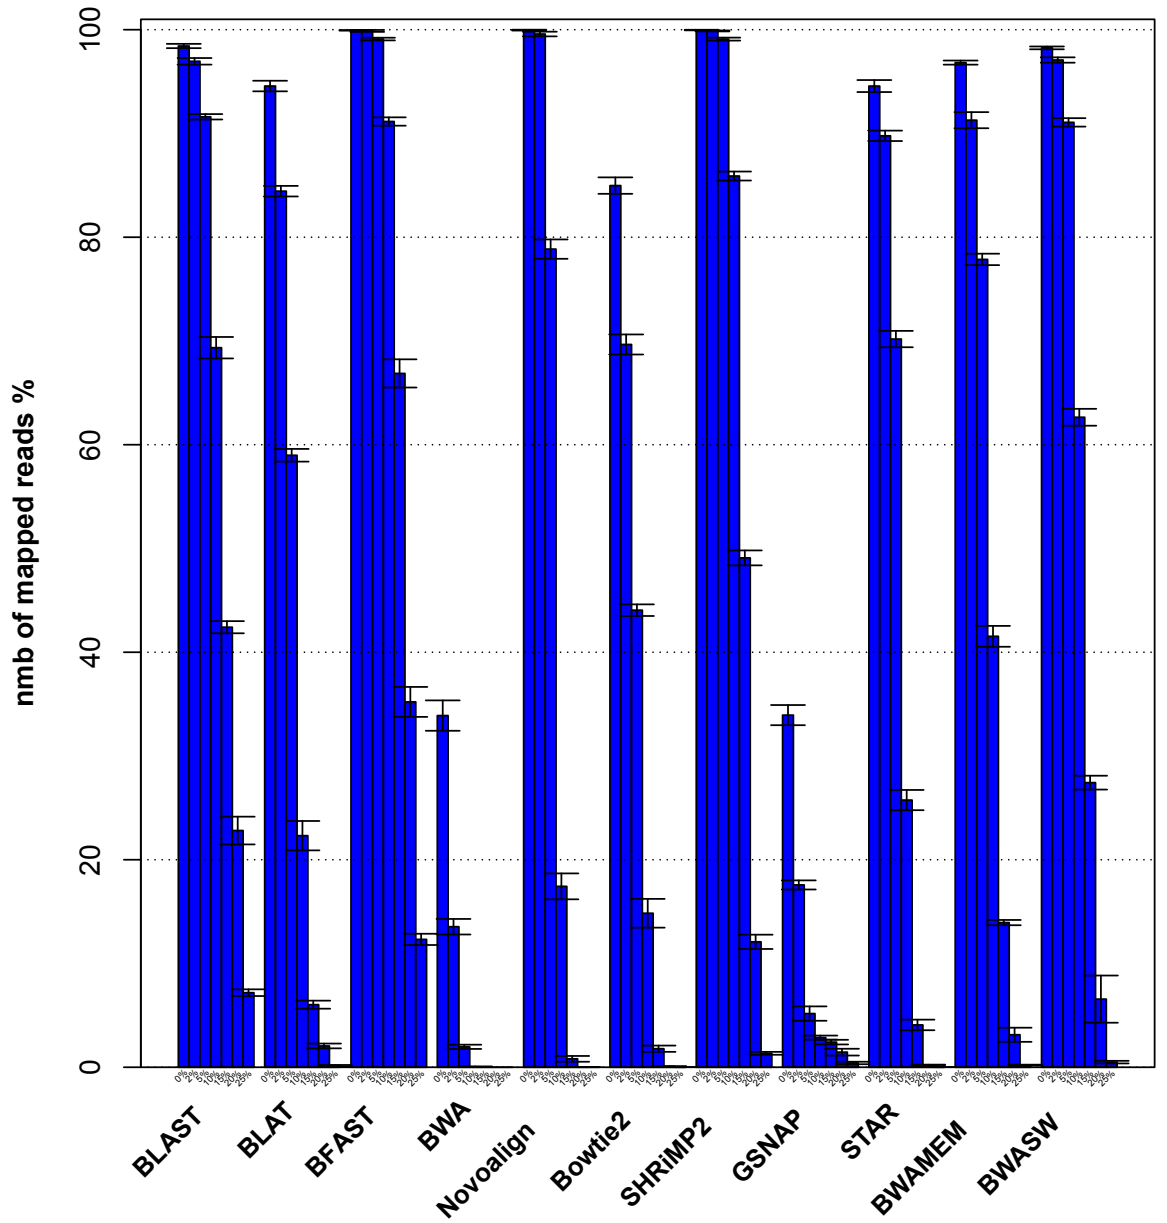

Figure S3: Histogram plot of the number of aligned reads obtained using default parameter value settings as a function of the mutation rate for each aligner averaged over the four viral genomes (see Table.1).



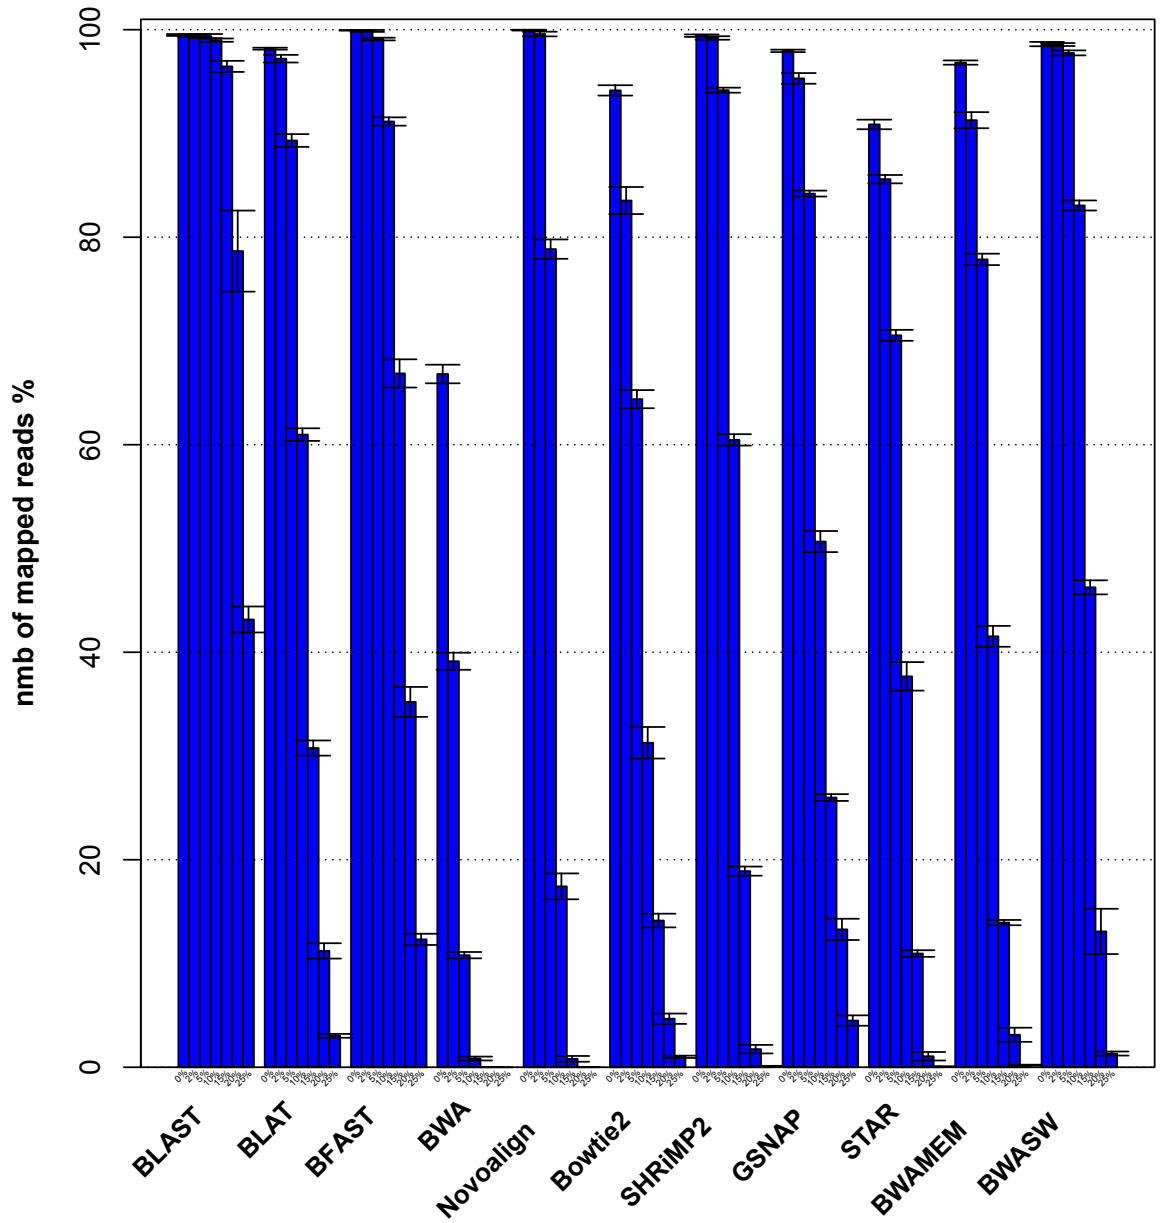

Figure S4: Histogram plot of the number of aligned reads obtained using high sensitivity parameter value settings as a function of the mutation rate for each aligner averaged over the four viral genomes (see Table.1).

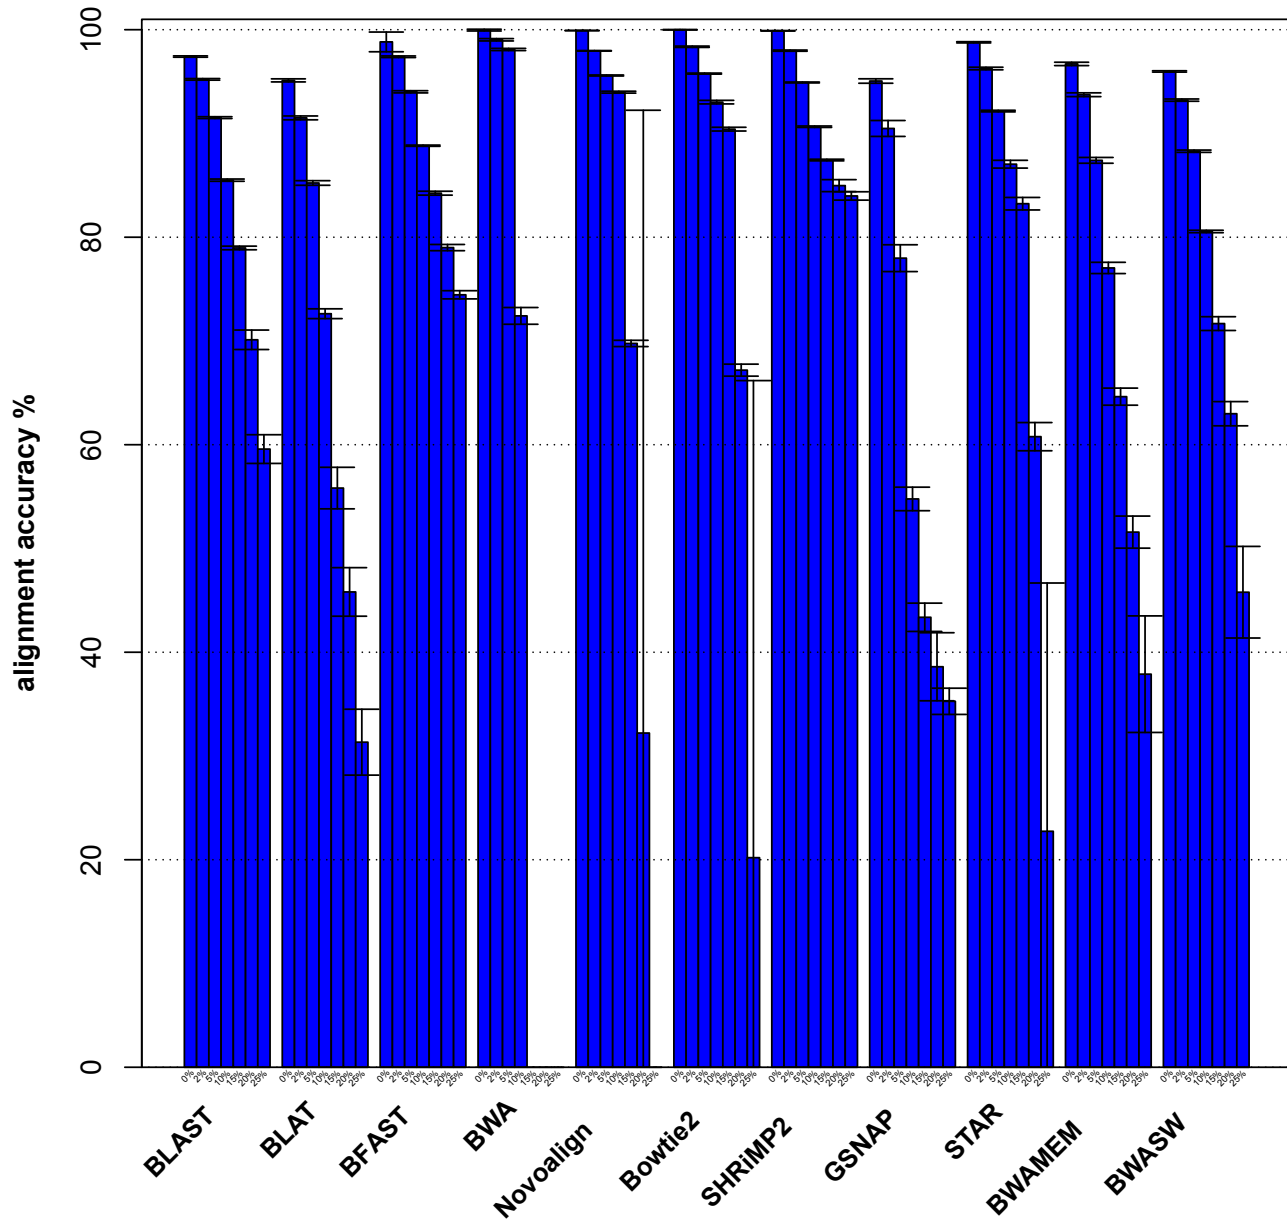

Figure S5: Histogram plot of the average accuracy obtained using default parameter value settings as a function of the mutation rate for each aligner averaged over the four viral genomes (see Table.1.).

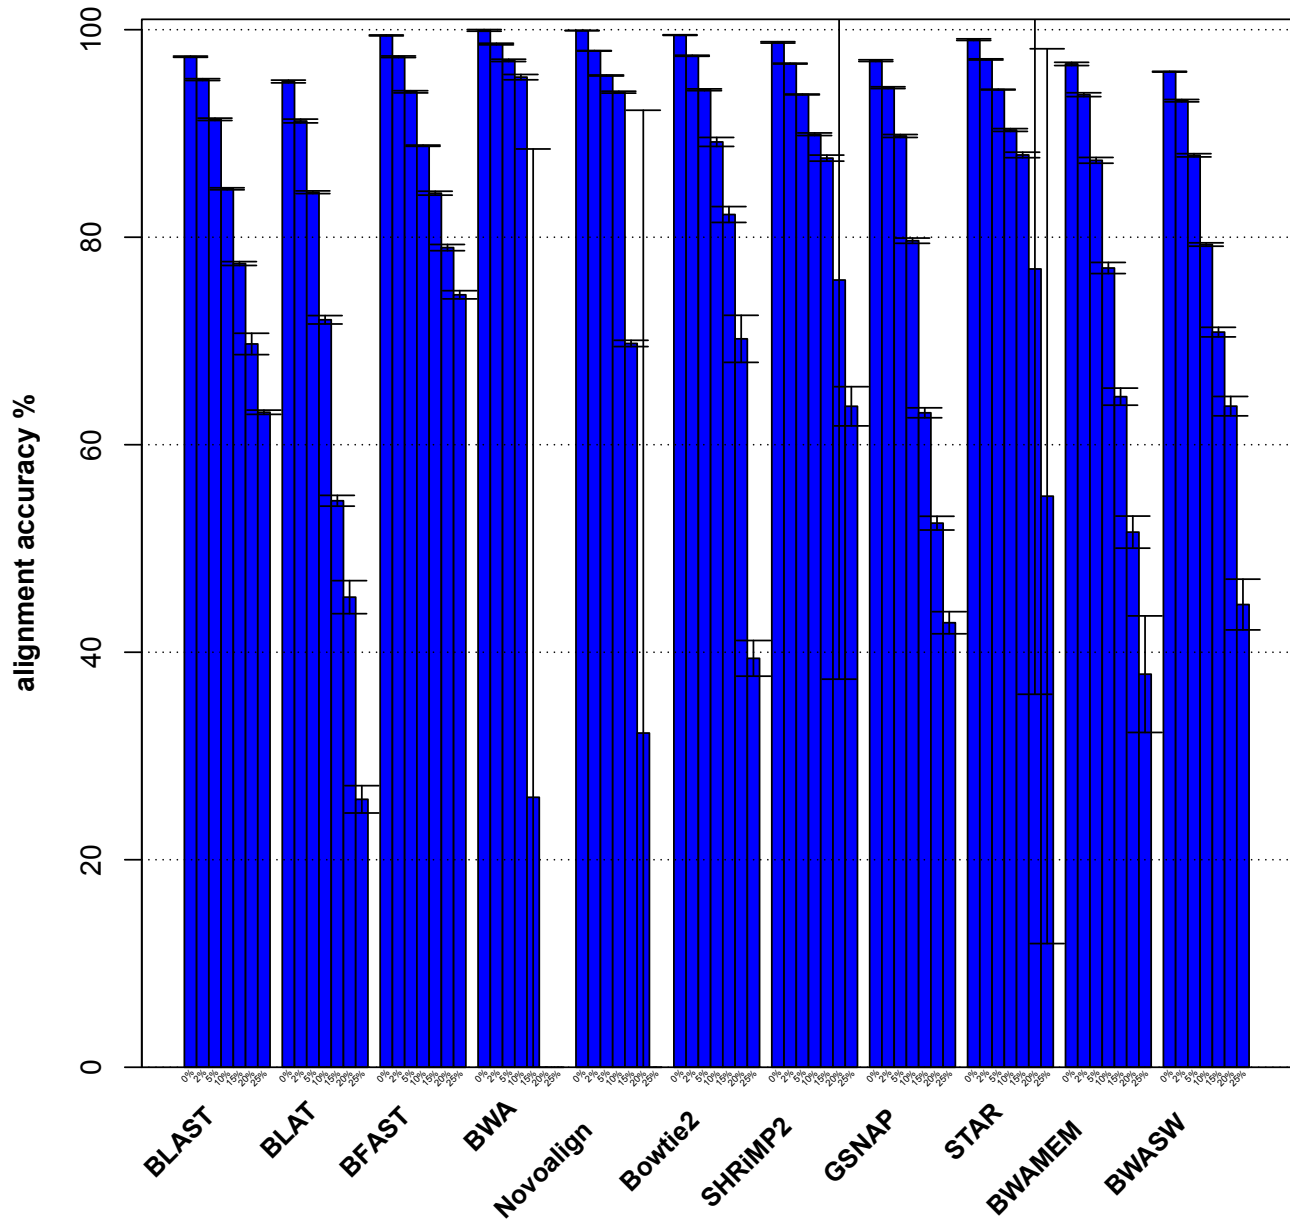

Figure S6: Histogram plot of the average accuracy obtained using high sensitivity parameter value settings as a function of the mutation rate for each aligner averaged over the four viral genomes (see Table.1.).
